# Supplementary material for: Real-time smartphone-based multi-parameter detection of nitrite, ammonia nitrogen, and total phosphorus in water
Source: Royal Society of Chemistry journal article supplement (doi:10.1039/d5ay00251f), 2025-01-01
Supplement: d5ay00251f1.pdf [file d5ay00251f1.pdf]

**Supporting Information (SI) on**

**Real-Time Smartphone-Based Multi-Parameter Detection of  
Nitrite, Ammonia nitrogen, and Phosphorus in Water**

Hao-Yu Zhang<sup>a</sup>, Yan Zhang<sup>b</sup>, Dengni Lai<sup>c\*</sup>, Li-Qun Chen<sup>a</sup>, Le-Qian Zhou<sup>a</sup>, Chang-le Tao<sup>a</sup>, Zhou Fang<sup>a</sup>,  
Rui-Rui Zhu<sup>b</sup>, Wen-Qi Long<sup>b</sup>, Jun-Wu Liu<sup>d</sup>, Ying-Chun Fang<sup>d</sup>, Jia Zhao<sup>a</sup>, Zhi-Bin Wu<sup>a</sup>, Lin Luo<sup>a</sup>,  
Yuan Yang<sup>a\*</sup>

a. Yuelushan Laboratory, College of the Environment and Ecology, Hunan Agricultural University,  
Changsha, 410128, China

b. Hunan Ecological and Environmental Monitoring Centre, Changsha, 410014, China

c. Yuelushan Laboratory, Hunan Academy of Agricultural Science, Changsha, 410125, Hunan, China

d. Engineering and Technology Research Center of Heavy Pollution Industrial Wastewater Treatment  
and Recycling of Hunan Province, Hunan Jascukin Technology Co., LTD, Changsha, 410000, China

Corresponding author:

Dr. Yuan Yang, E-mail: yangyuan041@163.com

Dr. Dengni Lai, E-mail: alexhast@163.com

**Section1. Tables of contents**

SI-Table1 Smartphone hardware parameters

SI-Table 2 Characteristic wavelengths of each product by the EPA method

SI-Table 3 Results of in-situ measurement(n=3)

**Section2. Figures of content**

SI-Fig.1 Materials a. colored glasses, b.3D printed black nylon, c. diffuser boards, d.  
Cupola placement tank, e. cuvette, f. light proof test tube box

SI-Fig 2 Chemical Reaction schematic diagram (a for nitrite, b for ammonia nitrogen,  
c for the total phosphorous)

SI-Fig 3 Smartphone measurement process (a is the download interface, b and c are

31 the operation interface)

32

33 SI-Fig 4 Color sampling points and color comparison

34

35 SI-Fig 5 Color complementation principle, and color corresponding wavelength

36

37 SI-Fig 6 G channel signal value obtained from different smartphone shooting  
38 processing analysis (a for nitrite, b for ammonia nitrogen, c for the total phosphorous)

39

40 SI-Fig7 Field in situ determination process

42

43

**SI-Table 1 Smartphone hardware parameters**

| Smartphone model | System  | Pixel (mp) | Aperture | Shutter (s) | ISO | Exp                  |
|------------------|---------|------------|----------|-------------|-----|----------------------|
| iPhone 12        | IOS     | 1200       | f/1.6    | 1/200       | 200 | -3.0~3.0             |
|                  | 17.5.1  |            | f/2.4    |             |     | Automatic adjustment |
| iPhone 13        | IOS     | 1200       | f/1.6    | 1/200       | 200 | -3.0~3.0             |
|                  | 17.5.1  |            | f/2.4    |             |     | Automatic adjustment |
| HONOR Magic 4    | Android | 5000       | f/1.6    | 1/250       | 50  | Automatic adjustment |
| Vivo             | Android | 500        | f/1.88   | 1/150       | 100 | Automatic adjustment |
| iQOO 10          |         |            | f/1.98   |             |     |                      |
|                  |         |            | f/2.2    |             |     |                      |
| Red Rice K50     | Android | 4800       | f/1.6    | 1/200       | 100 | Automatic adjustment |
| OPPO A92s        | Android | 4800       | f/1.8    | 1/150       | 100 | Automatic adjustment |
| XiaoMi 12        | Android | 5000       | f/1.7    | 1/200       | 100 | Automatic adjustment |

44

**SI-Table 2 Characteristic wavelengths of each product by the EPA method**

| Target substance | EPA Reference method | Color reaction system                         | characteristic wavelength |
|------------------|----------------------|-----------------------------------------------|---------------------------|
| Nitrite          | EPA 353.2            | Sulfonamine-nedd azo dye                      | 540 nm                    |
| Ammonia nitrogen | EPA 350.1            | Nessler's reagent method<br>(yellowish-brown) | 425 nm                    |
| Total phosphorus | EPA 365.3            | Molybdenum blue method<br>(blue complex)      | 680 nm                    |

46

47

48

49

50

51

| Material                                                                              | Nitrite           | Ammonia nitrogen  | Total phosphorus  |
|---------------------------------------------------------------------------------------|-------------------|-------------------|-------------------|
| Reference value of<br>QC sample                                                       | $0.405 \pm 0.025$ | $0.256 \pm 0.019$ | $1.500 \pm 0.050$ |
| Detected results of<br>QC sample                                                      | $0.404 \pm 0.001$ | $0.258 \pm 0.002$ | $1.483 \pm 0.021$ |
| Recovery rate (%)                                                                     | 99.7              | 100.8             | 98.9              |
| RSDs (%)                                                                              | 0.2               | 4.8               | 1.4               |
| Detected results of<br>real water sample                                              | $0.212 \pm 0.001$ | N.D.              | $0.335 \pm 0.005$ |
| Detected results of<br>real water<br>sample (spiked<br>0.5mg/L standard<br>substance) | $0.708 \pm 0.002$ | $0.495 \pm 0.001$ | $0.840 \pm 0.008$ |
| Recovery efficiency<br>of spiked samples<br>(%)                                       | 99.4              | 99.0              | 100.6             |

53 N.D. means that the detected result is lower than LOD of this method

55

56 SI-Fig.1 Materials a. colored glasses, b.3D printed black nylon, c. diffuser boards,

57 d. Cupola placement tank, e. cuvette, f. light proof test tube box

58

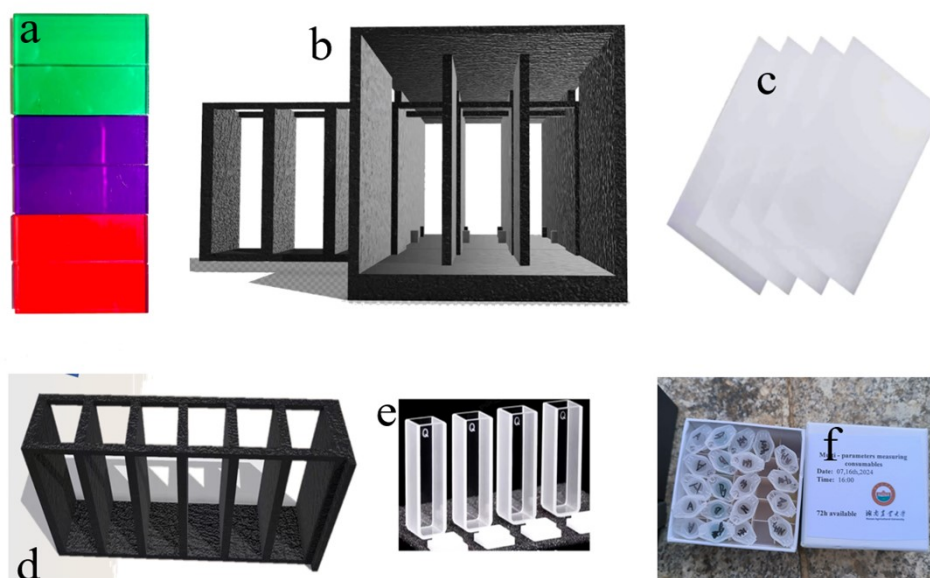

59

60 SI-Fig.2 Chemical Reaction schematic diagram (a for nitrite, b for ammonia

61 nitrogen, c for the total phosphorous)

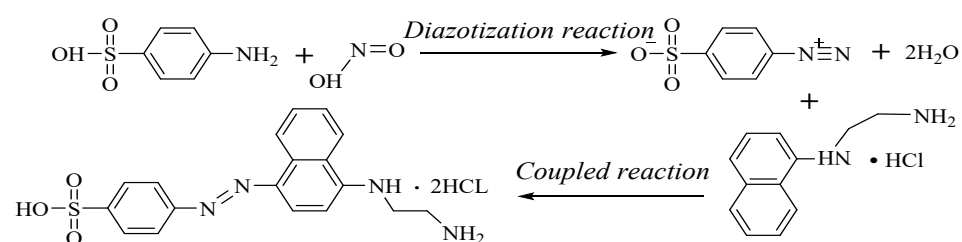

a. Nitrite color reaction (Griess)

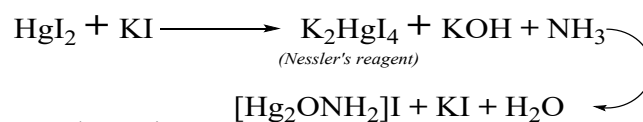

b. Ammonia nitrogen color reaction

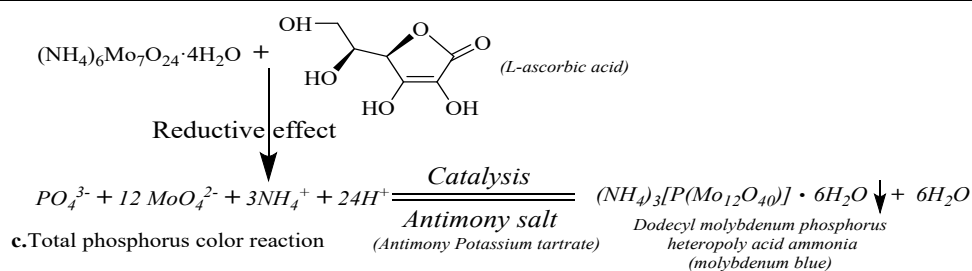

62

63 SI-Fig.3 Smartphone measurement process (a is the download interface, b and c  
64 are the operation interface)

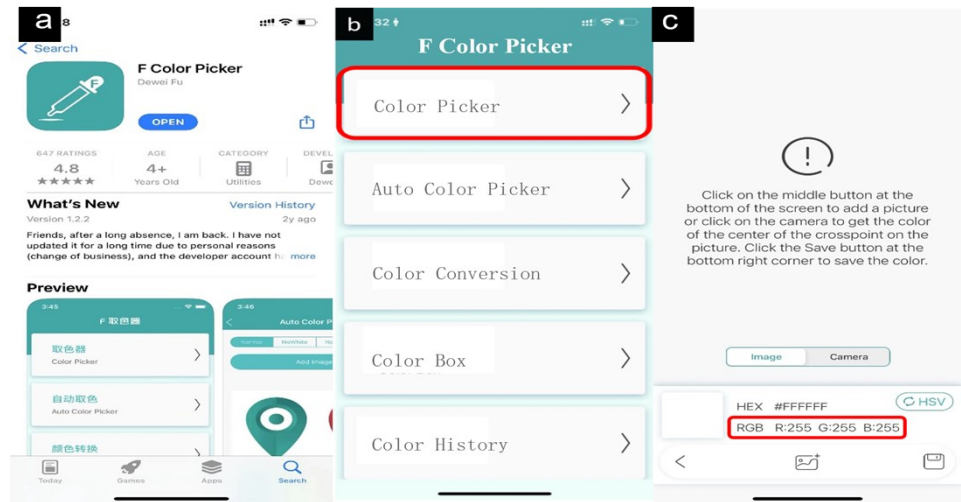

65 SI-Fig.4 Color sampling points and color comparison

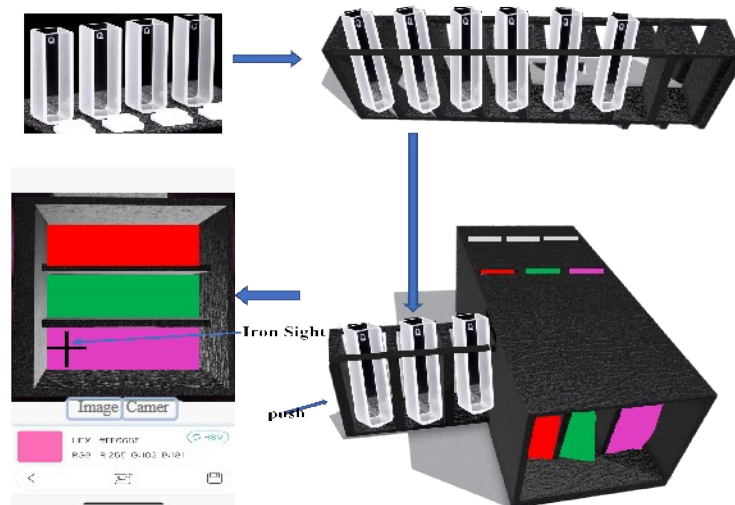

74

75 **SI-Fig.5 Color complementation principle, and color corresponding wavelength**

76

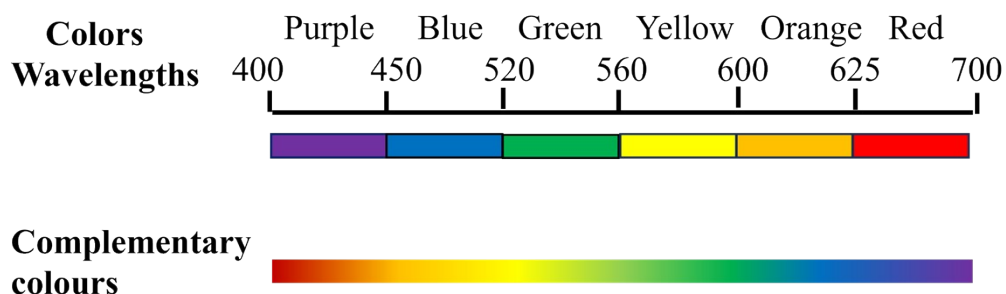

77

78

79

80

81

82

83

84

85

86

87

88

89

90

91

92

93

94

95

96

97

98

99

100

101

102

103

104 **SI-Fig.6 G channel signal value obtained from different smartphone shooting**  
105 **processing analysis (a for nitrite, b for ammonia nitrogen, c for the total**  
106 **phosphorous)(n=3)**

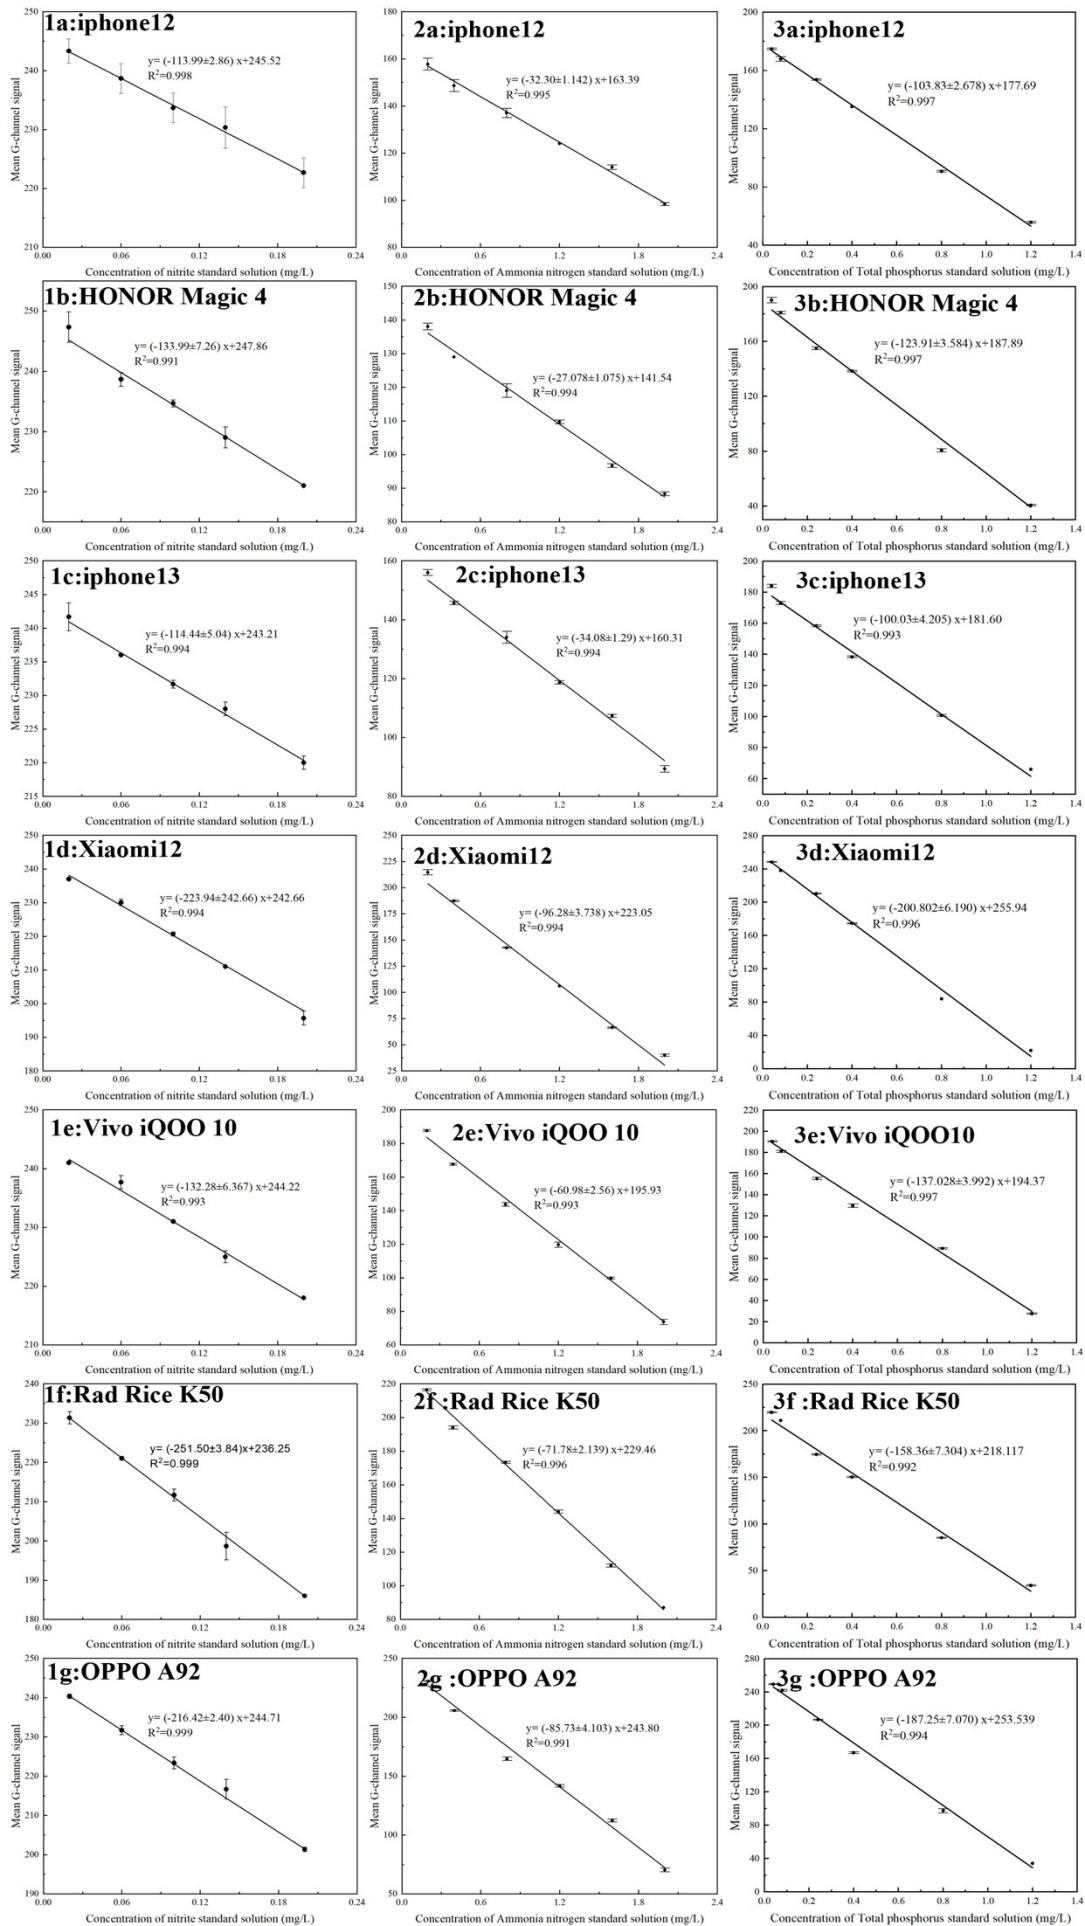



108 **SI-Fig.7 Field in situ determination process (a for carrying consumables and**  
109 **devices, b collecting water samples, c for adding color developing agent, d for**  
110 **multiparameter determination)**

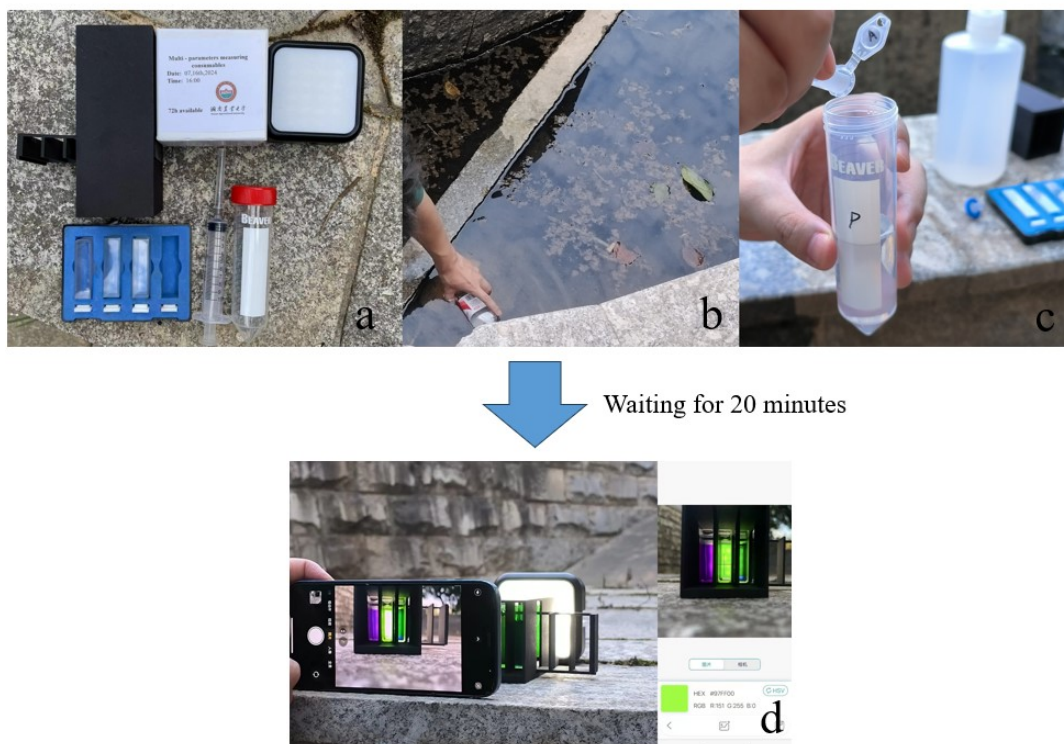

111

### 113 **Section3. Some Pretreatment Steps**

#### 114 **3.1 Water sample filtration operation based on microporous membrane: 0.22 -** 115 **µm MCE/GF Membrane Filtration for Water Sample Purification**

116 First, select the appropriate 0.22-µm pore-sized membranes made of mixed  
117 cellulose ester (MCE) or glass fiber (GF). Install these membranes correctly into  
118 syringe filters, ensuring that the membranes are flat, firmly attached, and free of any  
119 looseness or wrinkles to prevent impairment of the filtration efficiency. Subsequently,  
120 use a clean syringe to draw a specific volume of water samples, taking care to avoid  
121 introducing additional impurities during the sampling process. Connect the syringe  
122 tightly to the syringe filter equipped with the membrane, and then push the plunger of  
123 the syringe slowly and evenly to drive the water sample through the membrane under  
124 pressure. Given the fine pore size of MCE and GF membranes, suspended particles  
125 and other turbidity-causing substances in the water sample can be effectively  
126 intercepted. As a result, the filtered water sample flows into the collection container  
127 from the other end of the syringe filter, achieving the filtration process and removing  
128 the vast majority of suspended solids.

#### 129 **3.2 Pretreatment of water samples for determining total phosphorus content:** 130 **digestion based on potassium persulfate**

131 A suitable amount of water sample was collected in clean containers. If the  
132 sample was turbid or contained suspended matter, it was homogenized by stirring or  
133 ultrasonic treatment. If necessary, it could be filtered through a 0.22-micron  
134 membrane filter (which had been pre-tested to be free of phosphorus to avoid  
135 contamination), and then the filtration operation was carried out. Subsequently, a  
136 solution of potassium peroxodisulfate ( $K_2S_2O_8$ ) was added to the pre-treated sample,  
137 and the pH was adjusted to the neutral or slightly alkaline range (pH 6-8) using  
138 sulfuric acid ( $H_2SO_4$ ) or sodium hydroxide (NaOH). Then, the mixture was  
139 transferred to a high-pressure-resistant glass digestion tube or a  
140 polytetrafluoroethylene (PTFE) digestion container, and sealed digestion was  
141 performed at 120-124°C and a pressure of 1.1-1.3 kilograms per square centimeter in  
142 a portable multi-functional rapid digestion instrument for 30 minutes to ensure that all

143 organic and polymeric phosphorus was completely converted into orthophosphate.  
144 After digestion, the heat source was turned off, and the system was allowed to cool  
145 naturally to room temperature. Before opening the container, the pressure was slowly  
146 released, and the digestion solution was diluted to its original volume (except in cases  
147 where evaporation occurred during digestion) using ultra-pure water. If necessary, a  
148 blank control group was prepared, that is, using ultra-pure water instead of the sample  
149 while keeping all other operation steps exactly the same to eliminate the influence of  
150 reagent background interference.

151 On-site neutralization procedure:

152 A 5 mL aliquot of the water sample was transferred to an appropriate dis-  
153 solving tube, followed by the addition of pre-packaged potassium persulfate sol-  
154 ution. Digestion was subsequently performed at a constant temperature of 120  
155 ° C for 30 minutes using a portable multifunctional digestion instrument. After  
156 cooling to ambient temperature, the pH of the digested solution was adjusted to  
157 the neutral to slightly alkaline range.

#### 158 **Section4. On-site applicability technology**

##### 159 4.1 Power management specifications

###### 160 a. A self-powered white light source lamp

161 This system is equipped with a 3.7V/2000mAh lithium battery. It can support  
162 continuous operation for 2 to 10 hours in outdoor environments, with a brightness of  
163 up to 800 LUX at 0.5 meters and a color temperature ranging from 2500K to 9000K.  
164 It is equipped with a charging module and can be used in conjunction with a portable  
165 power bank or a fixed power source.

###### 166 b. Portable multi-functional rapid digestion instrument

167 This system is equipped with a 24V/12Ah lithium iron phosphate battery and a  
168 compatible inverter (150W pure sine wave), featuring short circuit protection, over-  
169 temperature cooling and dehumidification protection. In an outdoor environment (at  
170 25°C), it can operate continuously for approximately 2 hours. It can be used together  
171 with portable power sources or fixed power supplies. Based on the actual situation on

172 site, choose "battery power supply" or "power supply".

#### 173 4.2 Environmental operating ranges

174 Operational temperature range: 10°C to 45°C;

175 Humidity tolerance: 10-90% RH (non-condensing);

176 Operating pressure: atmospheric pressure;

177 Identify applicable bodies of water for the project: surface water, groundwater and

178 other natural water bodies, domestic sewage, rainwater, etc;

179 Weather (Interference from External Light Sources): Suitable for on-site measurement

180 outside (external light source interference can be disregarded).

#### 181 4.3 Sample handling procedures

182 The sample processing needs to be carried out according to the EPA standards or

183 the Chinese national standards as follows for the pre-treatment: Filtration: See details

184 in SI3-1; Resolution: See details in SI3.2; Dilute (if necessary); Color development:

185 See details in 2.4; Determination: See details in 2.4.

186 Note: It is necessary to pay attention to the environmental parameters such as

187 volume, time, concentration, and sampling depth provided in each of the above

188 sections.

#### 189 4.4 Data collection protocols

190 The data acquisition protocol employs smartphone-based image capture to

191 extract colorimetric information, which is automatically processed by a self-

192 developed algorithm to quantify target analyte concentrations. This integrated system

193 incorporates quality control modules and delivers intuitively visualized results

194 through a user interface specifically designed for simplified operation under field

195 conditions.
